# Supplementary material for: Thickness-dependent hydrogen evolution reaction activity on Pd films: an insightful view from magnetism
Source: Royal Society of Chemistry journal article supplement (doi:10.1039/d4tc05009f), 2025-01-01
Supplement: d4tc05009f1.pdf [file d4tc05009f1.pdf]

SUPPLEMENTARY MATERIAL FOR

**Thickness-dependent Hydrogen Evolution Reaction Activity on Pd thin film: an insightful view from magnetism**

Dong-Xue Liu,<sup>a</sup> Hong Hong,<sup>a</sup> Qingqi Cao,<sup>a</sup> Dunhui Wang<sup>\*ab</sup> and Youwei Du<sup>a</sup>

*<sup>a</sup> National Laboratory of Solid State Microstructures, Collaborative Innovation Center of Advanced Microstructures, Jiangsu Provincial Key Laboratory for Nanotechnology, School of Physics, Nanjing University, Nanjing 210093, China.*

*<sup>b</sup> Hangzhou Dianzi University, Hangzhou, Zhejiang 310018, China.*

*\* email: wangdh@hdu.edu.cn*

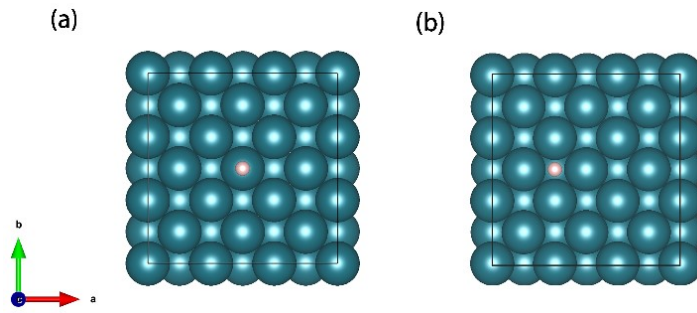

**Figure S1.** The optimized structure for H atom adsorption on Pd top site (a), hollow site (b), respectively.

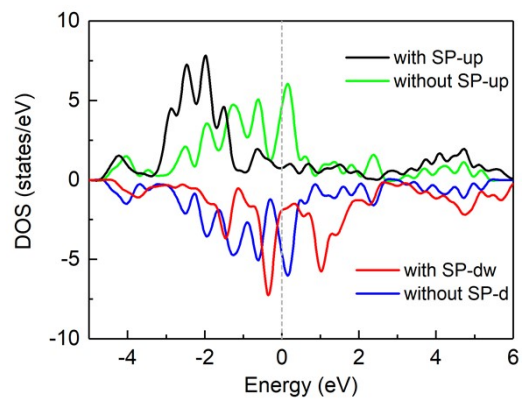

**Figure S2.** The PDOS of d orbital of the Pd active site for 4 ML Pd (001) thin film in FM and NM state.

**Table S1** The ground states, and the  $\Delta G_{H^*}$  of different adsorption sites for 3~10 ML Pd (001) thin films without SOC

| Thickness<br>(ML ) | The ground<br>state | The $\Delta G_{H^*}$ of<br>top site (eV) | The $\Delta G_{H^*}$ of<br>hollow site<br>(eV) |
|--------------------|---------------------|------------------------------------------|------------------------------------------------|
| 3                  | NM                  | -0.17                                    | -0.45                                          |
| 4                  | FM                  | -0.11                                    | -0.38                                          |
| 5                  | NM                  | -0.13                                    | -0.54                                          |
| 6                  | NM                  | -0.15                                    | -0.58                                          |
| 7                  | NM                  | -0.17                                    | -0.60                                          |
| 8                  | NM                  | -0.18                                    | -0.64                                          |
| 9                  | FM                  | -0.14                                    | -0.55                                          |
| 10                 | NM                  | -0.19                                    | -0.66                                          |

**Table S2** The ground state, the average distance between the top to subsurface Pd (001) layer, d(Pd-Pd) (Å), and H and Surface Pd Atoms, d(H-Pd) (Å).

| Thickness<br>(ML) | Magnetic<br>state | d(Pd-Pd)<br>(Å) | d(H-Pd)<br>(Å) |
|-------------------|-------------------|-----------------|----------------|
| 3                 | NM                | 2.6935          | 1.6301         |
| 4                 | FM                | 2.6906          | 1.5379         |
| 5                 | NM                | 2.6930          | 1.5394         |
| 6                 | NM                | 2.6937          | 1.5406         |
| 7                 | NM                | 2.6945          | 1.5410         |
| 8                 | NM                | 2.6951          | 1.5412         |
| 9                 | FM                | 2.6933          | 1.5395         |
| 10                | NM                | 2.6954          | 1.5424         |

In table S2, one can see that the top layer to subsurface layer Pd-Pd distance (d (Pd-Pd)) varies with thickness of Pd (001) thin films. When the 4 and 9 ML Pd (001) film is ferromagnetic, the d (Pd-Pd) is 2.6906 and 2.6933 Å, respectively. They are both smaller than their adjacent nonmagnetic 3/5 and 8/10 ML Pd films, indicating that the coupling strength between the top layer and sublayer is enhanced when the Pd film is ferromagnetic. Obviously, the catalytic activity of Pd film ( $\Delta G_{H^*}$ ) is consistent with the evolution trend of the d (Pd-Pd). In addition, it is worth noting that the same is to the equilibrium H to Pd distance (d(H-Pd) (Å)). This means that the structure of Pd films is also important to their HER activity.

**Table S3** The ground states, and the  $\Delta G_{H^*}$  of top site for 11~16 ML Pd (001) thin films

| Thickness<br>(ML) | The ground state | The $\Delta G_{H^*}$ of<br>top site (eV) |
|-------------------|------------------|------------------------------------------|
| 11                | NM               | -0.191                                   |
| 12                | NM               | -0.195                                   |
| 13                | NM               | -0.200                                   |
| 14                | NM               | -0.205                                   |
| 15                | FM               | -0.158                                   |
| 16                | NM               | -0.211                                   |

## Discussion HER activity about 9 ML Pd (001) film:

**Table S4** The ground states, and the  $\Delta G_{H^*}$ , the d-band center and the H Bader charge for H atom of 9 ML Pd (001) film.

| The ground state | The $\Delta G_{H^*}$ of top site (eV) | d-band center (eV) | H Bader charge( e ) |
|------------------|---------------------------------------|--------------------|---------------------|
| NM               | -0.151                                | -1.683             | 0.021               |
| FM               | -0.132                                | -1.704             | 0.028               |

The HER performance of 9 ML Pd (001) thin films in NM conditions (MAGMOM is set as 0) is also calculated, and the corresponding results are shown in Table S4. We find that the top site is still active site for it. The calculated  $\Delta G_{H^*}$  under NM state is -0.151 eV, which exhibits a poor HER activity than that of ferromagnetic state (-0.132 eV). Furthermore, the calculated d-band center under NM state is -1.683 eV, which is closer to Fermi Level than that under FM state (-1.704 eV). The H Bader charge in NM state is 0.021 |e|, which is less than that in FM state (0.028 |e|), evidencing that magnetism indeed promote the transfer of the electron between substrate and adsorbate. Both the d-band center and the H Bader electron show that the ferromagnetism in Pd thin film can lead to excellent HER performance.
